## Correspondence

## Correction/Clarification about FDA Review Documents

## Erick Turner

Emma Veitch cites my *PLoS Medicine* Essay [1] about how the Food and Drug Administration's (FDA's) review of documents can serve as a source of clinical trials data, but she follows it up with the statement, "However, it is difficult to have confidence in data released by sponsors when the data have not been subjected to external, independent peer review. Furthermore, this information is not integrated with other data, or indexed" [2].

While I agree with the second assertion, the first assertion—that the data are not subjected to external, independent peer review—is off the mark. FDA reviews are indeed external and independent to the sponsor. These reviews are conducted not by the sponsors but by physicians and scientists employed by the United States government. True, the data originate with the sponsor. However, once the sponsor submits data to the FDA, a level of rigor and scrutiny is applied to them that is arguably higher than what occurs in the typical journal manuscript review process.

First, FDA reviewers typically revisit the original protocol submitted before the study was conducted in order to verify that the sponsor has not engaged in hypothesizing after the results are known ("HARKing") [3]. By contrast, journal reviewers typically do not have access to the original protocol. As a result, they must trust that HARKing has not occurred, a dubious assumption in view of recent data [4].

Second, FDA statistical reviewers obtain the raw data from the sponsor, and determine whether the sponsor's findings can be replicated. By contrast, journal reviewers typically have access to only the summary statistics reported (perhaps selectively) to them by the authors or the sponsors. Consequently, reviewers can only speculate whether they could replicate the findings.

As a result, I believe that the FDA review process warrants a higher level of confidence than the conventional journal manuscript review process. ■

## Erick Turner

Portland VA Medical Center and Oregon Health and Science University  
Portland, Oregon, United States of America  
E-mail: turnere@ohsu.edu

**Citation:** Turner E (2005) Correction/clarification about FDA review documents. *PLoS Med* 2(12): e422.

**Copyright:** © 2005 Erick Turner. This is an open-access article distributed under the terms of the Creative Commons Attribution License, which permits unrestricted use, distribution, and reproduction in any medium, provided the original author and source are credited.

**Competing Interests:** ET is author of the *PLoS Medicine* Essay cited in this Editorial and discussed in the present response. Also, ET is a former reviewer (medical officer) with the FDA.

**DOI:** 10.1371/journal.pmed.0020422

## References

1. Turner EH (2004) A taxpayer-funded clinical trials registry and results database. *PLoS Med* 1: e60. DOI: 10.1371/journal.pmed.0010060
2. Veitch E, *PLoS Medicine* Editors (2005) Tackling publication bias in clinical trial reporting. *PLoS Med* 2: e367. DOI: 10.1371/journal.pmed.0020367
3. Kerr NL (1998) HARKing: Hypothesizing after the results are known. *Pers Soc Psychol Rev* 2: 196–217.
4. Chan AW, Hrobjartsson A, Haahr MT, Gotzsche PC, Altman DG (2004) Empirical evidence for selective reporting of outcomes in randomized trials: Comparison of protocols to published articles. *JAMA* 291: 2457–2465.

## Editor's Reply

Erick Turner appropriately points out the high levels of rigor applied during regulatory authorities' review of clinical trial data [1]. However, the statement beginning "However, it is difficult to have confidence in data released by sponsors..." [2] was not intended to highlight the release of review documents by the Food and Drug Administration (FDA), but rather the publication of summary clinical trial data on sponsors' own Web sites, which does seem to lack an integral peer-review mechanism. I support efforts to make Drugs@FDA more systematic and comprehensive, an initiative which can sit comfortably alongside peer-reviewed journal publication. ■

## Emma Veitch

*PLoS Clinical Trials*  
Cambridge, United Kingdom  
E-mail: eveitch@plos.org

**Citation:** Veitch E (2005) Editor's reply. *PLoS Med* 2(12): e423.

**Copyright:** © 2005 Emma Veitch. This is an open-access article distributed under the terms of the Creative Commons Attribution License, which permits unrestricted use, distribution, and reproduction in any medium, provided the original author and source are credited.

**Competing Interests:** EV is Publications Manager for *PLoS Clinical Trials*.

**DOI:** 10.1371/journal.pmed.0020423

## References

1. Turner E (2005) Correction/clarification about FDA review documents. *PLoS Med* 2(12): e422.
2. Veitch E, the *PLoS Medicine* Editors (2005) Tackling publication bias in clinical trial reporting. *PLoS Med* 2: e367. DOI: 10.1371/journal.pmed.0020367

## The Statistical Significance of Suffering

## Kristen Suthers

Musa Mayer makes several good points about the importance of enrolling people with life-threatening conditions in clinical trials in order to identify new treatments and speed the pipeline along for the greater good [1]. However, the idea that clinical trial enrollment suffers when seriously ill individuals are provided compassionate use of treatments is myopic; one does not negate the other. In many cases, persons who seek compassionate use of medications are ineligible for the clinical trials Mayer would want them to enroll in, and will likely die or suffer considerably before the experimental treatment they are seeking is approved for the public. In a world of limited resources, we need to ask, how do we encourage enrollment in clinical trials to develop treatments and cures that will benefit people in the future, while humanely treating those who are ineligible for these trials and suffer right now? The first step is to understand that clinical trial enrollment and compassionate-use programs are not competing interests today, as they perhaps were in the 1980s and 1990s. The next step is to educate the public, not only about the importance of enrollment in clinical trials, but about their rights as informed participants in the noble process of science. Mayer's perspective [1] fails to consider the ultimate goal of clinical trials: to relieve human suffering. It serves no one's interest to demand an all-or-nothing approach to scientific progress. As Einstein said, "Not everything that can be counted counts, and not everything that counts can be counted." ■

Kristen Suthers

GDNF 4 Parkinson's

Washington, District of Columbia, United States of America

E-mail: kristensuthers@yahoo.com

**Citation:** Suthers K (2005) The statistical significance of suffering. *PLoS Med* 2(12):e421.

**Copyright:** © 2005 Kristen Suthers. This is an open-access article distributed under the terms of the Creative Commons Attribution License, which permits unrestricted use, distribution, and reproduction in any medium, provided the original author and source are credited.

**Competing Interests:** The author has declared that no competing interests exist.

**DOI:** 10.1371/journal.pmed.0020421

#### Reference

1. Mayer M (2005) When clinical trials are compromised: A perspective from a patient advocate. *PLoS Med* 2: e358. DOI: 10.1371/journal.pmed.0020358

## Controlling the Spread of HIV/AIDS in the Indian Subcontinent

### Govindasamy Agoramoorthy, Minna J. Hsu

The article on HIV/AIDS infection by Singh and colleagues outlines an alarming fact about the spread of this deadly virus in Nepal [1]. We would like to add that more assertive campaigns are necessary to curb the spread of infection in the Indian subcontinent before it's too late. In the year 2000 alone, a total of 5.3 million people were infected with HIV worldwide [2]. Since the epidemic started two decades ago, HIV/AIDS has killed 22 million people globally. India, Indochina, and the former Soviet republics have seen the most rapid rise of HIV incidence in recent years. AIDS experts have raised alarm bells over its spread in the Asia-Pacific region, and called for a united effort to control it. The Joint United Nations Programme on HIV/AIDS (UNAIDS) estimates about 5 million people in India alone are infected.

The first report of HIV/AIDS infection in India was in 1986, and since then the virus has spread rapidly throughout the country. Both HIV serotypes 1 and 2 exist in India, and HIV-1 C is the most common subtype reported. Sexual transmission of HIV is the predominant route of transmission in India [3]. According to the Ministry of Health in New Delhi, only 3% of Indians use condoms for birth control, since the tradition and culture dictate that women undergo sterilization or take birth control pills. Prostitution plays a major role in spreading the disease among the heterosexuals in urban areas. Although Mumbai appears to be the main locus for AIDS, rapid spread has occurred through other major cities as well. Migration of people from cities to rural areas is so rapid that the disease may already be out of control in many areas. The blood screening tests conducted at most hospitals in rural India are not adequate to confirm presence of the virus, making blood transfusion unsafe. The National AIDS Control Organization (NACO), the apex body for controlling AIDS in India, has reported a high incidence (8.2%) of blood donors who are HIV-positive among healthy blood donors in urban areas [4].

AIDS is a sexually transmitted disease, and as long as people are educated thoroughly and warned about the dangerous consequences of unsafe sex, there is less to fear. Unfortunately, the intervention program launched by the NACO had very little impact in controlling the spread of the epidemic in India [4]. The current educational programs are often restricted to the passive dissemination of information through posters, media, and display of safe-sex billboards behind automobiles. More aggressive efforts are, therefore, needed to reach out to each and every rural/urban

community throughout India to combat the spread of the disease. The state and central government agencies must build specialized shelters for people with HIV/AIDS. More funds must be spent for effective AIDS awareness campaigns, research, routine screening tests, and treatment.

According to the Asia Pacific Network of People Living with AIDS, a considerable number of people were refused treatment or delayed provision of treatment or health services after being diagnosed with HIV/AIDS. Breaches of confidentiality by health workers were common in Asian countries. Within families and communities, women were discriminated against more than men—including ridicule, harassment, and physical assault—and they were often forced to change their place of residence because of their HIV status [5].

Although politicians and policymakers are increasingly committed to AIDS prevention and control efforts in countries such as India, a multidisciplinary approach such as early identification and treatment of sexually transmitted diseases, promotion of condom usage, rapid blood screening to test for HIV in rural areas, public awareness campaigns, poverty eradication, and development of prevention interventions have to be considered for effective control of the spread of this virus in the Indian subcontinent.

Moreover, people from all walks of life must take an active role to promote AIDS awareness and prevention across the Indian subcontinent. It is time for the local and regional celebrities, such as political leaders, movie stars, and beauty pageant winners, in the Indian subcontinent to get involved in helping people with HIV and in educating the public, which would certainly raise awareness among the rural public more quickly than current efforts. It is time to remember how the late Princess of Wales reached out to people with AIDS, shook hands to console them, and also raised millions of dollars for their welfare. Countries in the Indian subcontinent have experienced and handled the outbreak of deadly epidemics in the past [6], and we hope that AIDS can also be controlled and eradicated eventually in the near future. ■

Govindasamy Agoramoorthy (agoram@mail.nsysu.edu.tw)

Tajen University

Yanpu, Taiwan, Republic of China

Minna J. Hsu (hsumin@mail.nsysu.edu.tw)

National Sun Yat-sen University

Kaohsiung, Taiwan, Republic of China

**Citation:** Agoramoorthy G, Hsu MJ (2005) Controlling the spread of HIV/AIDS in the Indian subcontinent. *PLoS Med* 2(12):e420.

**Copyright:** © 2005 Agoramoorthy and Hsu. This is an open-access article distributed under the terms of the Creative Commons Attribution License, which permits unrestricted use, distribution, and reproduction in any medium, provided the original author and source are credited.

**Competing Interests:** The authors have declared that no competing interests exist.

**DOI:** 10.1371/journal.pmed.0020420

#### References

1. Singh S, Mills E, Honeyman S, Suvedi BK, Pant NP (2005) HIV in Nepal: Is the violent conflict fuelling the epidemic? *PLoS Med* 2: e216. DOI: 10.1371/journal.pmed.0020216
2. Joint United Nations Programme on HIV/AIDS (2002) AIDS epidemic update. Geneva: Joint United Nations Programme on HIV/AIDS. Available: [http://www.unaids.org/html/pub/Publications/IRC-pub03/epiupdate2002\\_en\\_pdf.pdf](http://www.unaids.org/html/pub/Publications/IRC-pub03/epiupdate2002_en_pdf.pdf). Accessed 9 November 2005.
3. Godbole S, Mehendale S (2005) HIV/AIDS epidemic in India: Risk factors, risk behaviour and strategies for prevention and control. *Indian J Med Res* 121: 356–368.
4. Choudhury N, Ayagiri A, Ray VL (2000) True HIV seroprevalence in Indian blood donors. *Transfus Med* 10: 1–4.
5. Paxton S, Gonzales G, Uppakaew K, Abraham KK, Okta S, et al. (2005) AIDS-related discrimination in Asia. *AIDS Care* 17: 413–424.
6. Karlen A (1995) Man and microbes. Disease and plagues in history and modern times. New York: Simon and Schuster. 266 p.
